# Supplementary material for: Complete Mitochondrial Genome and Its Phylogenetic Position in Red Algae Fushitsunagia catenata from South Korea
Source: MDPI journal article supplement (doi:10.3390/life14040534), 2024-04-22
Supplement: s1 [file s1]

Supplementary Data

# Complete Mitochondrial Genome and Its Phylogenetic Position in Red Algae *Fushitsunagia catenata* from South Korea

Maheshkumar Prakash Patil <sup>1</sup>, Nur Indradewi Oktavetri <sup>2</sup>, Young-Ryun Kim <sup>3</sup>, Seokjin Yoon <sup>4</sup>, In-Cheol Lee <sup>5</sup>, Jong-Oh Kim <sup>6,7,\*</sup> and Kyunghoi Kim <sup>2,5,\*</sup>

<sup>1</sup> Industry-University Cooperation Foundation, Pukyong National University, 45 Yongso-ro, Nam-gu, Busan 48513, Republic of Korea

<sup>2</sup> Study Program of Environmental Engineering, Faculty of Science and Technology, Universitas Airlangga, Surabaya 60115, Indonesia; nur-i-o@fst.unair.ac.id

<sup>3</sup> Marine Eco-Technology Institute, Busan 48520, Republic of Korea

<sup>4</sup> Dokdo Fisheries Research Center, National Institute of Fisheries Science, Pohang 37709, Republic of Korea

<sup>5</sup> Department of Ocean Engineering, Pukyong National University, 45 Yongso-ro, Nam-gu, Busan 48513, Republic of Korea

<sup>6</sup> Department of Microbiology, Pukyong National University, 45 Yongso-ro, Nam-gu, Busan 48513, Republic of Korea

<sup>7</sup> School of Marine and Fisheries Life Science, Pukyong National University, 45 Yongso-ro, Nam-gu, Busan 48513, Republic of Korea

\* Correspondence: jokim@pknu.ac.kr (J.-O.K.); hoikim@pknu.ac.kr (K.K.); Tel.: +82-51-629-6583 (K.K.); Fax: +82-51-629-6590 (K.K.)

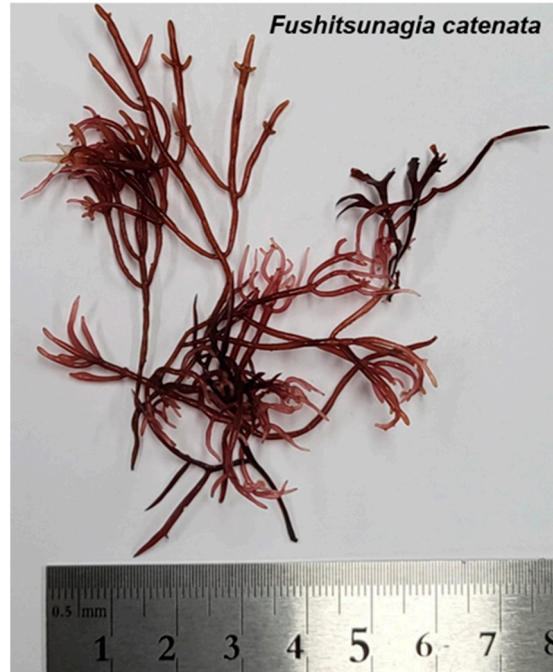

**Figure S1.** A specimen image of *Fushitsunagia catenata*, a macroalga that was collected from the East Sea in South Korea. It is about 11 to 14 cm tall, has straight and hard apices, and irregular branching.

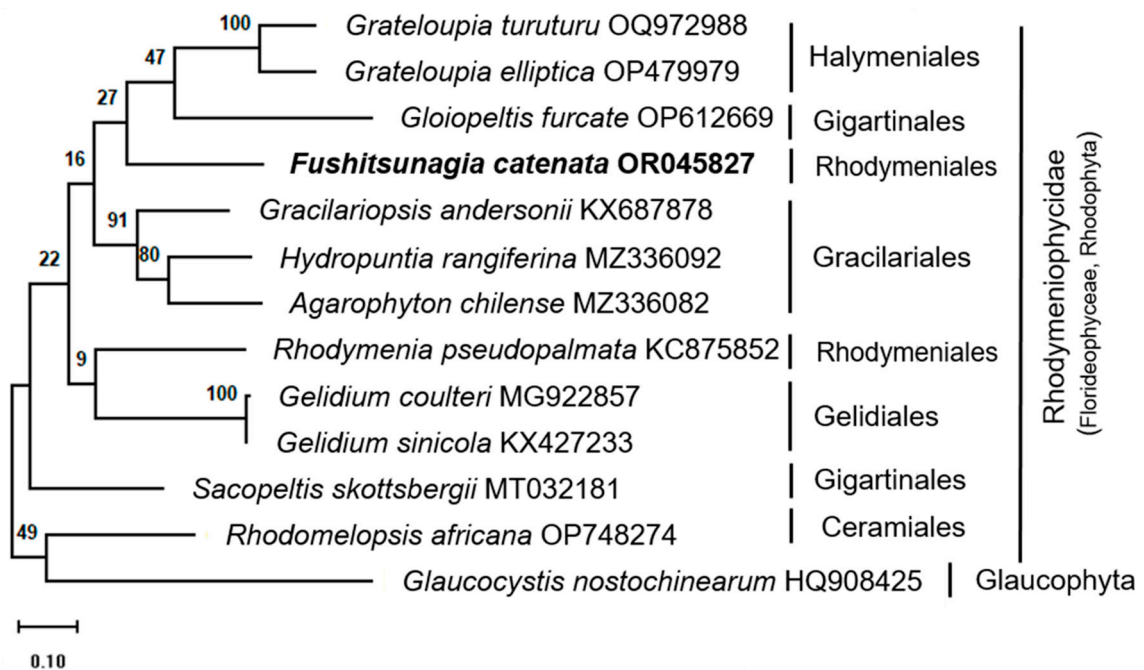

**Figure S2.** The phylogenetic tree generated from maximum likelihood (ML) analysis for the *cox1* gene sequences of several algae species. The sequence generated in this study is in bold. Numbers at nodes represent the bootstrap values based on 1000 replicates.

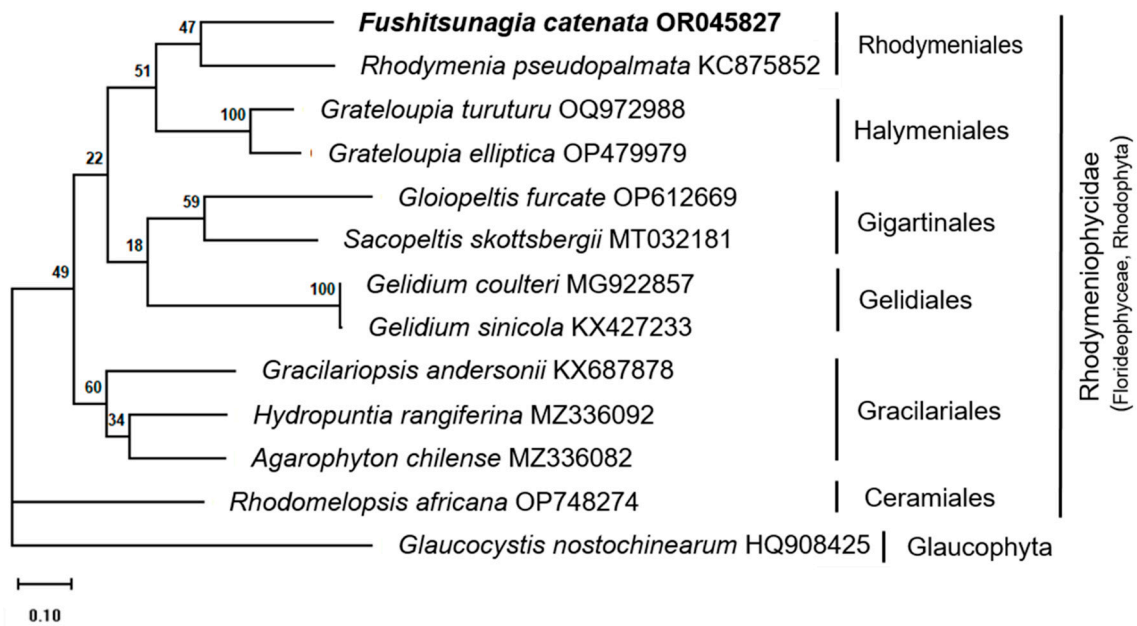

**Figure S3.** The phylogenetic tree generated from maximum likelihood (ML) analysis for the *cox3* gene sequences of several algae species. The sequence generated in this study is in bold. Numbers at nodes represent the bootstrap values based on 1000 replicates.

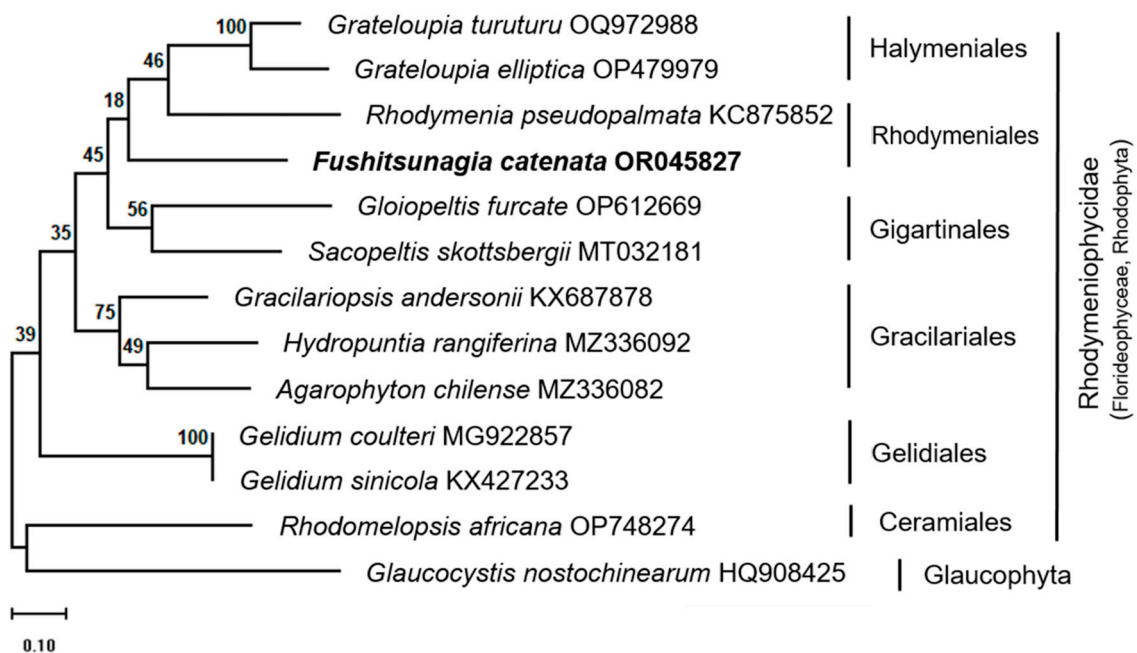

**Figure S4.** The phylogenetic tree generated from maximum likelihood (ML) analysis for the *cob* gene sequences of several algae species. The sequence generated in this study is in bold. Numbers at nodes represent the bootstrap values based on 1000 replicates.

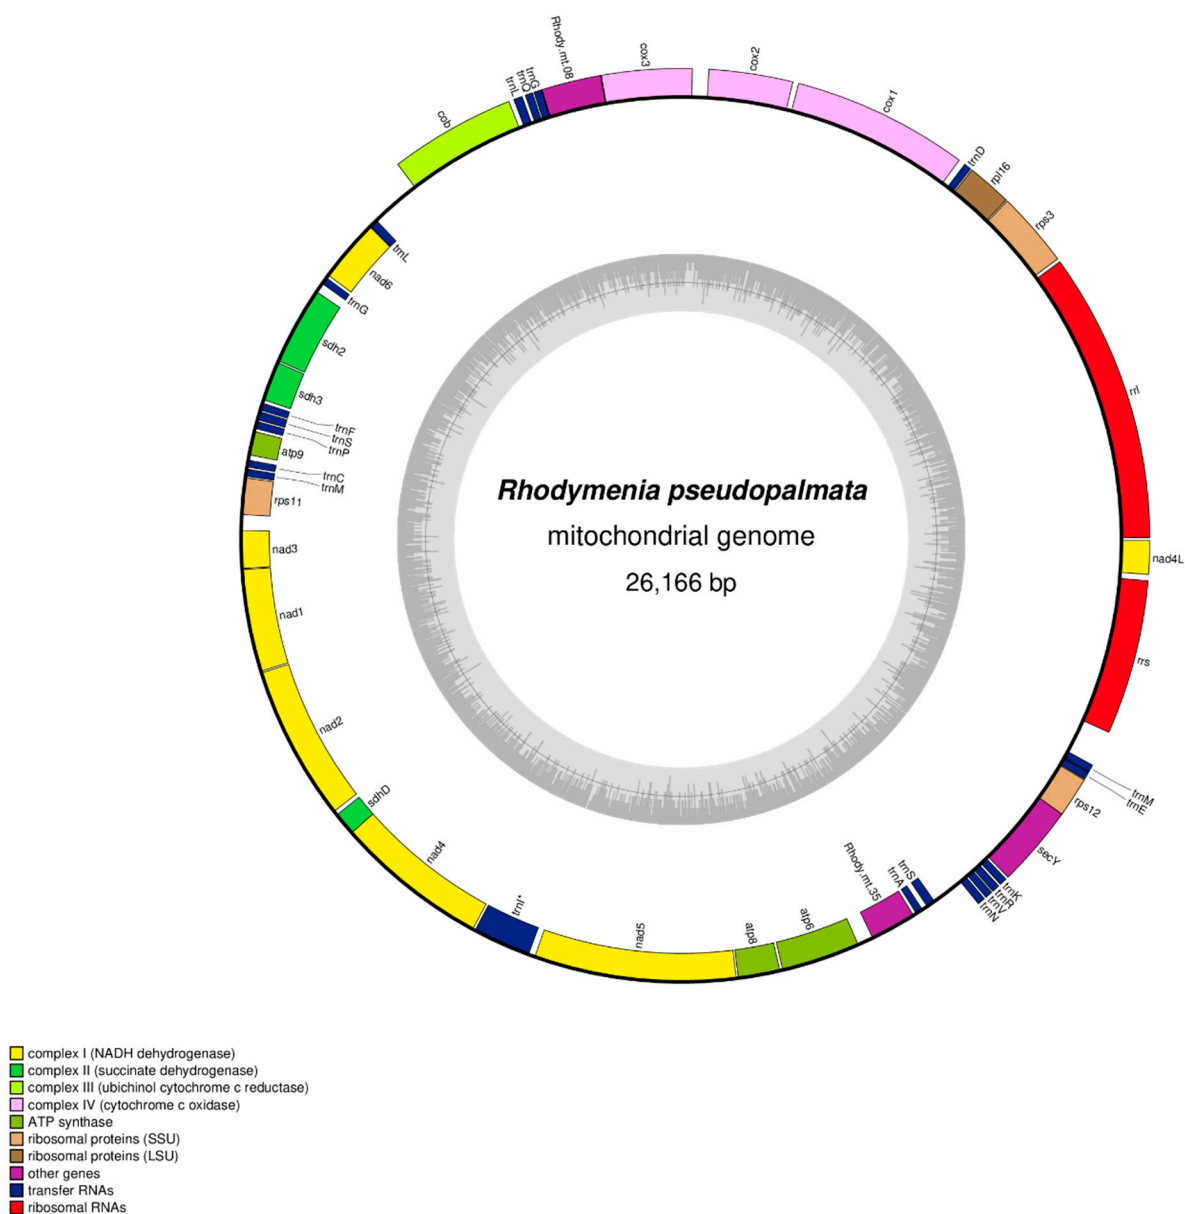

**Figure S5.** The circular mitochondrial genome of *Rhodymenia pseudopalmata* (GenBank accession no. KC875852). Map visualization was produced using OGDRAW. The colors reflect the grouping of functional genes together with their acronyms.

**Table S1.** Codon usage of *Fushitsunagia catenata* (OR045827) mitochondrial protein-coding genes.

| AA  | Codon | No. | %     | Fraction | AA  | Codon | No. | %     | Fraction | AA  | Codon | No. | %     | Fraction |
|-----|-------|-----|-------|----------|-----|-------|-----|-------|----------|-----|-------|-----|-------|----------|
| Ala | GCG   | 27  | 0.453 | 0.09     | Lys | AAG   | 32  | 0.537 | 0.13     | Arg | CGT   | 42  | 0.705 | 0.31     |
|     | GCA   | 125 | 2.097 | 0.41     |     | AAA   | 224 | 3.758 | 0.88     |     | CGC   | 17  | 0.285 | 0.13     |
|     | GCT   | 132 | 2.214 | 0.43     |     | TTG   | 118 | 1.980 | 0.13     |     | AGT   | 107 | 1.795 | 0.21     |
|     | GCC   | 23  | 0.386 | 0.07     | Leu | TTA   | 568 | 9.529 | 0.63     | Ser | AGC   | 35  | 0.587 | 0.07     |
| Cys | TGT   | 54  | 0.906 | 0.69     |     | CTG   | 16  | 0.268 | 0.02     |     | TCG   | 32  | 0.537 | 0.06     |
|     | TGC   | 24  | 0.403 | 0.31     |     | CTA   | 75  | 1.258 | 0.08     |     | TCA   | 174 | 2.919 | 0.34     |
| Asp | GAT   | 117 | 1.963 | 0.87     |     | CTT   | 108 | 1.812 | 0.12     |     | TCT   | 137 | 2.332 | 0.27     |
|     | GAC   | 17  | 0.285 | 0.13     |     | CTC   | 15  | 0.252 | 0.02     |     | TCC   | 26  | 0.436 | 0.05     |
| Glu | GAG   | 31  | 0.554 | 0.21     | Met | ATG   | 157 | 2.634 | 1.0      | Thr | ACG   | 27  | 0.453 | 0.08     |
|     | GAA   | 122 | 2.047 | 0.79     | Asn | AAT   | 208 | 3.489 | 0.76     |     | ACA   | 109 | 1.829 | 0.34     |
| Phe | TTT   | 515 | 8.639 | 0.88     |     | AAC   | 66  | 1.107 | 0.24     |     | ACT   | 151 | 2.533 | 0.47     |
|     | TTC   | 72  | 1.208 | 0.12     | Pro | CCG   | 16  | 0.268 | 0.08     |     | ACC   | 33  | 0.554 | 0.10     |
| Gly | GGG   | 41  | 0.688 | 0.13     |     | CCA   | 75  | 1.258 | 0.38     | Val | GTG   | 32  | 0.537 | 0.08     |
|     | GGA   | 100 | 1.678 | 0.31     |     | CCT   | 88  | 1.476 | 0.44     |     | GTA   | 139 | 2.332 | 0.36     |
|     | GGT   | 140 | 2.349 | 0.43     |     | CCC   | 19  | 0.319 | 0.10     |     | GTT   | 191 | 3.204 | 0.50     |
|     | GGC   | 43  | 0.721 | 0.13     | Gln | CAG   | 25  | 0.419 | 0.15     |     | GTC   | 23  | 0.386 | 0.06     |
| His | CAT   | 96  | 1.610 | 0.79     |     | CAA   | 138 | 2.315 | 0.85     | Trp | TGG   | 46  | 0.772 | 0.36     |
|     | CAC   | 25  | 0.419 | 0.21     | Arg | AGG   | 14  | 0.235 | 0.10     |     | TGA   | 83  | 1.392 | 0.64     |
| Ile | ATA   | 139 | 2.332 | 0.24     |     | AGA   | 37  | 0.621 | 0.27     | Tyr | TAT   | 168 | 2.818 | 0.69     |
|     | ATT   | 388 | 6.509 | 0.67     |     | CGG   | 8   | 0.134 | 0.06     |     | TAC   | 74  | 1.241 | 0.31     |
|     | ATC   | 55  | 0.923 | 0.09     |     | CGA   | 18  | 0.302 | 0.13     |     |       |     |       |          |
